# Supplementary material
Source: ML conference proceedings conference paper supplement (https://openreview.net/forum?id=rOufYULiqe5)

cluster 1(y=0)

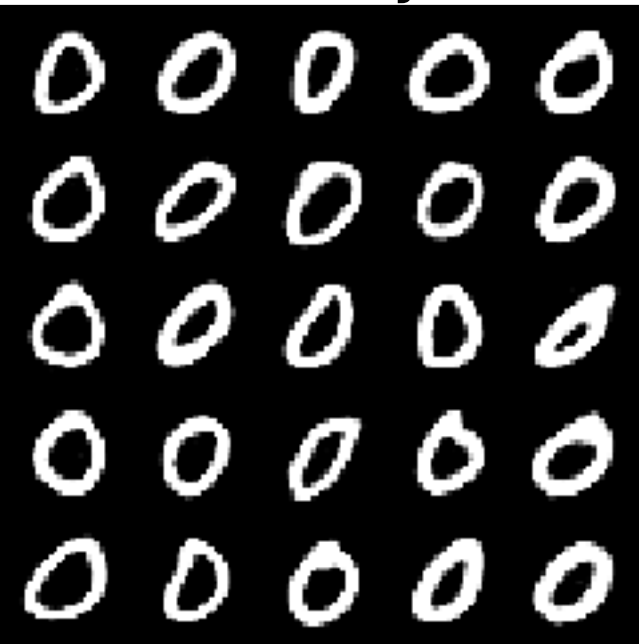

cluster 3(y=1)

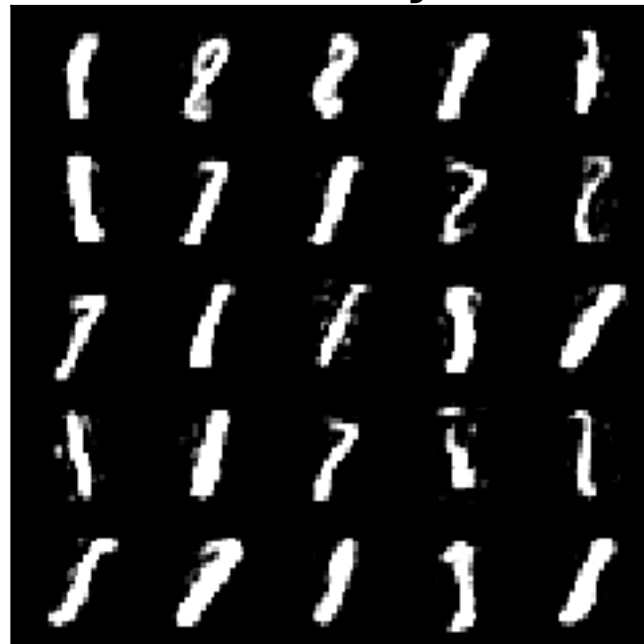

cluster 12(y=2)

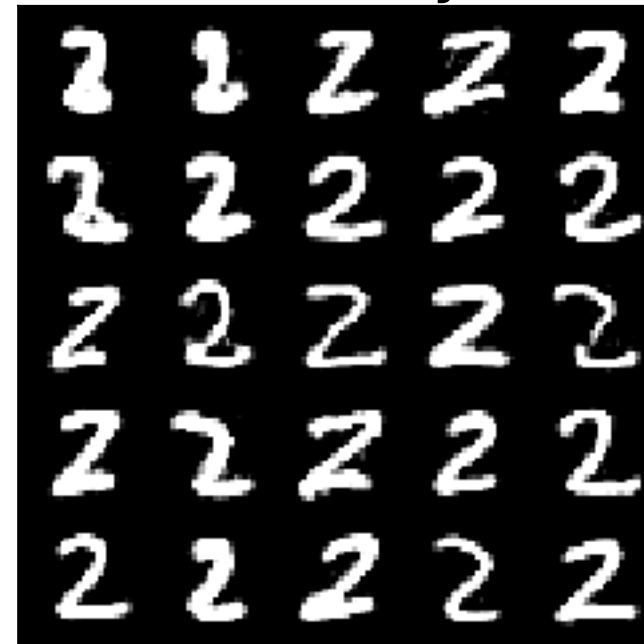

cluster 6(y=3)

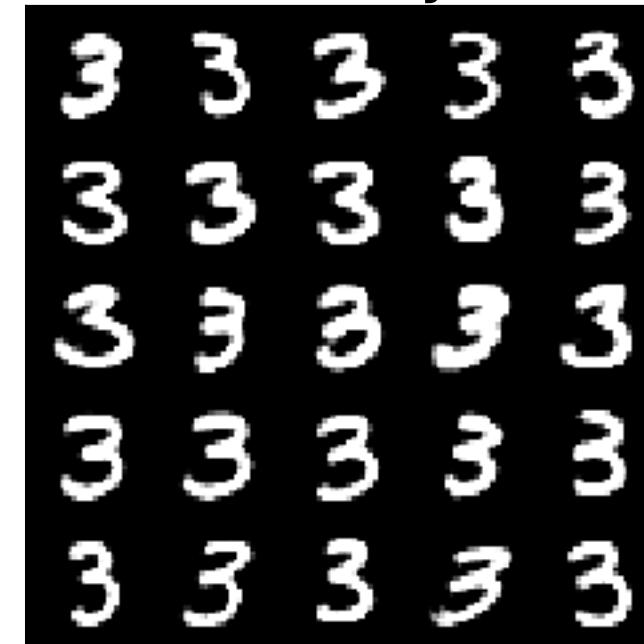

cluster 7(y=4)

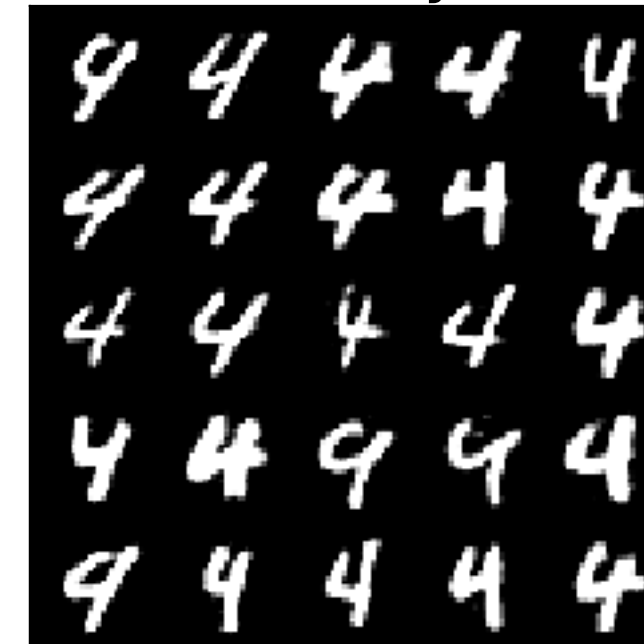

cluster 25(y=5)

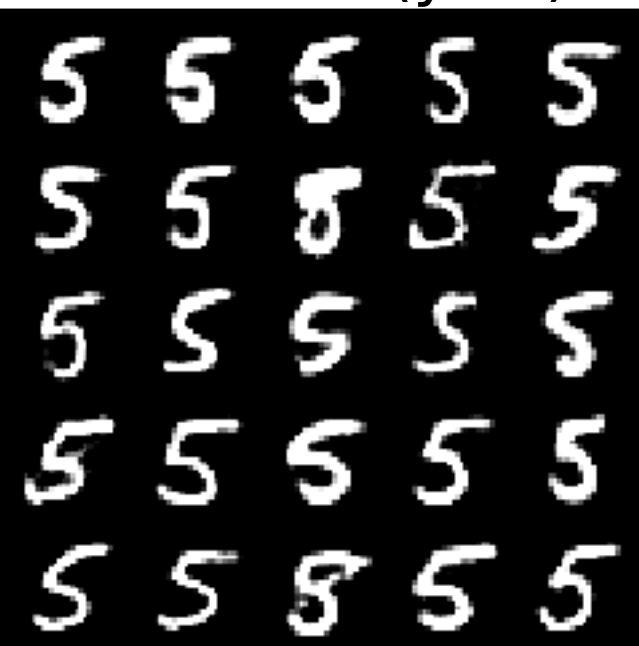

cluster 9(y=6)

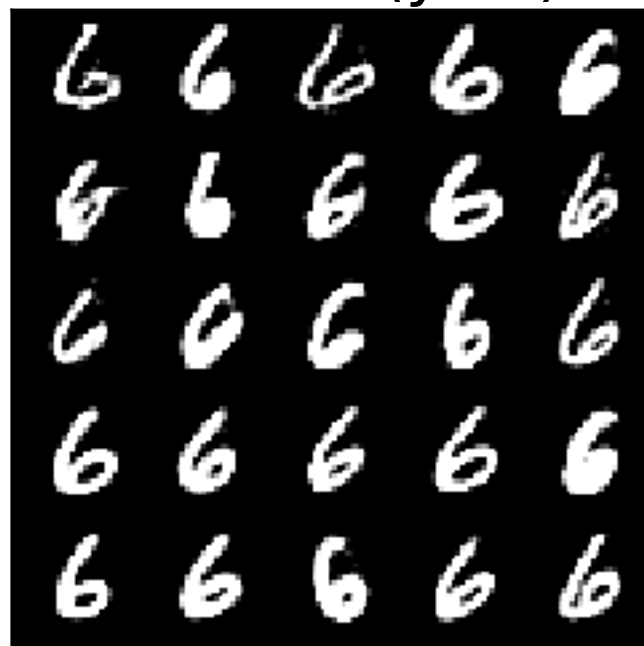

cluster 15(y=7)

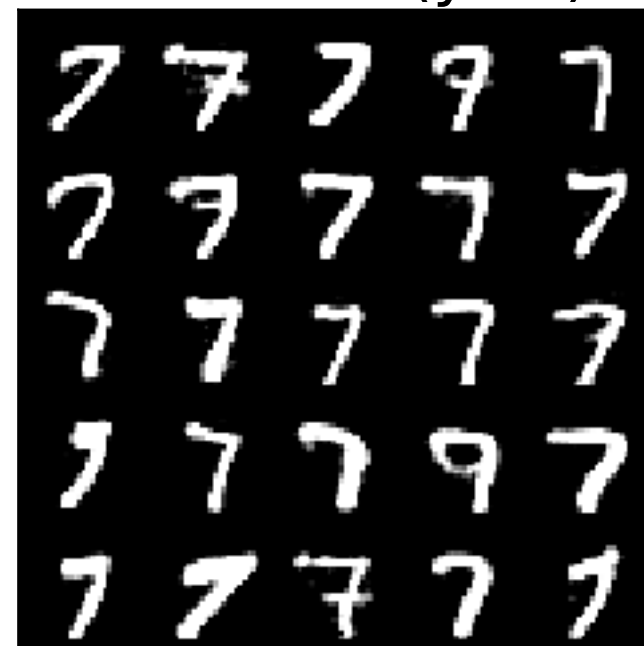

cluster 16(y=8)

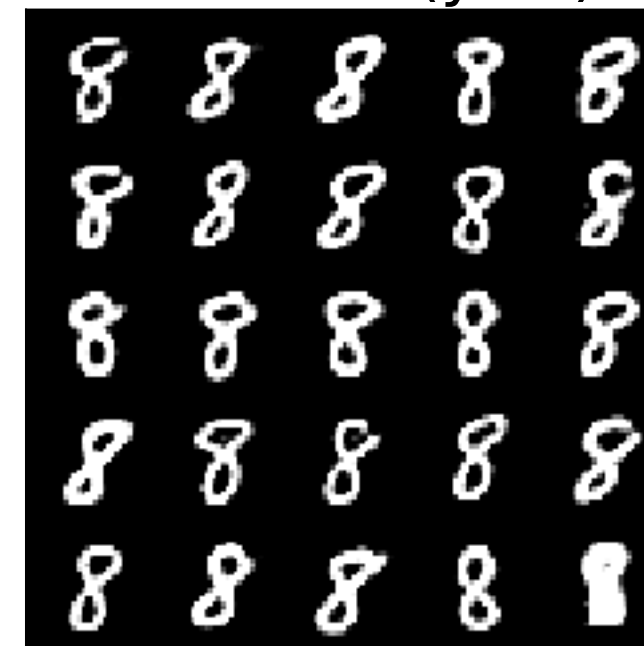

cluster 4(y=9)

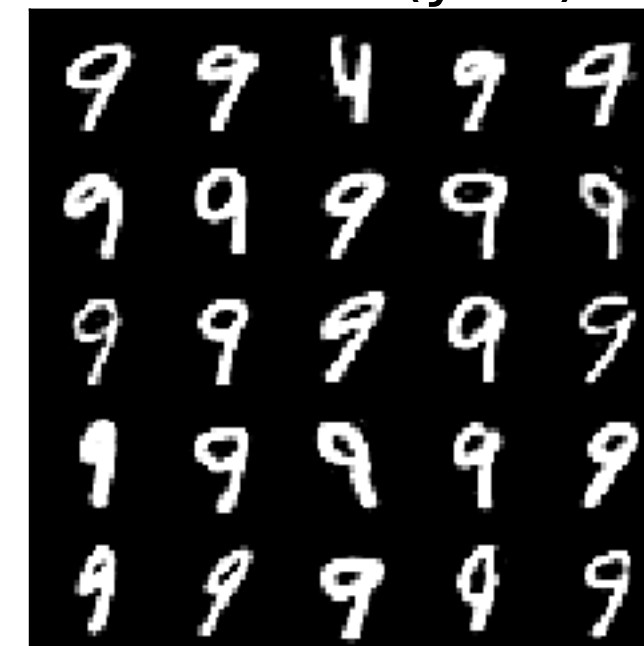

Supplement: supplementary_material [file attachment]
