# Supplementary material
Source: ML conference proceedings conference paper supplement (https://openreview.net/forum?id=rOufYULiqe5)

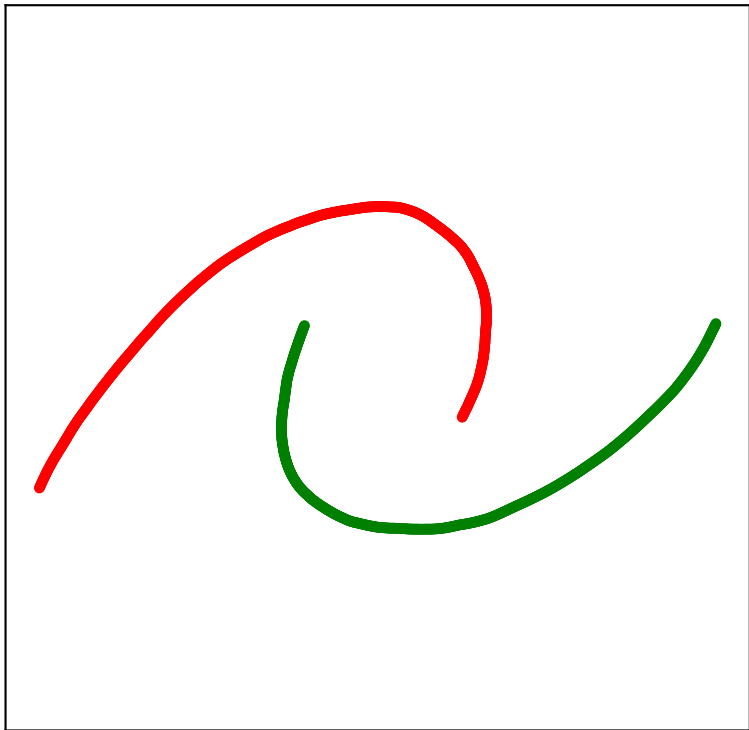

Supplement: supplementary_material [file attachment]

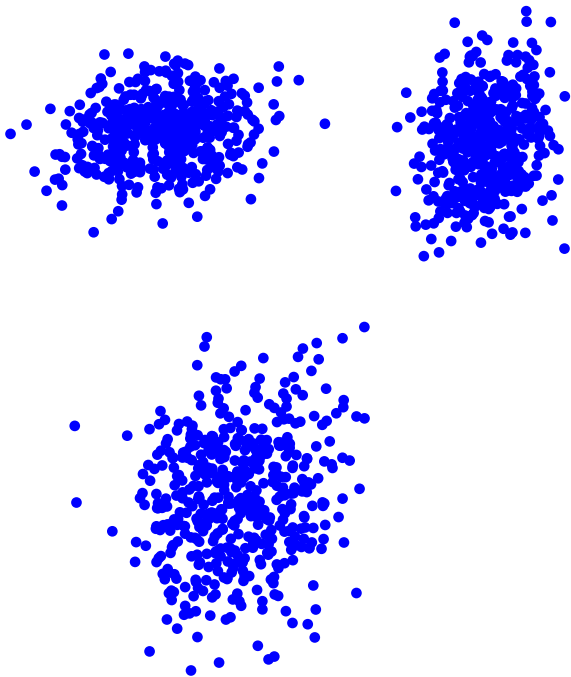

Supplement: supplementary_material [file attachment]

DDPM Epoch 0

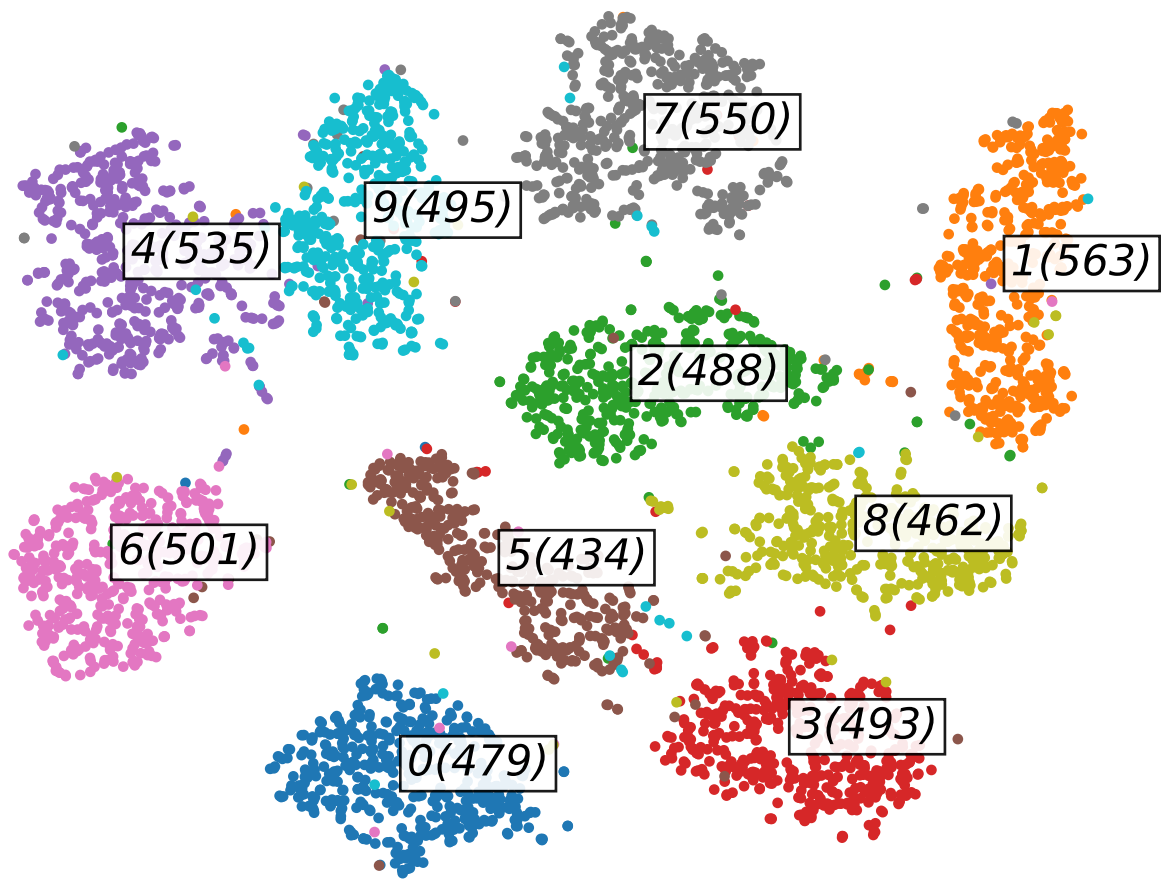

DDPM Epoch 2

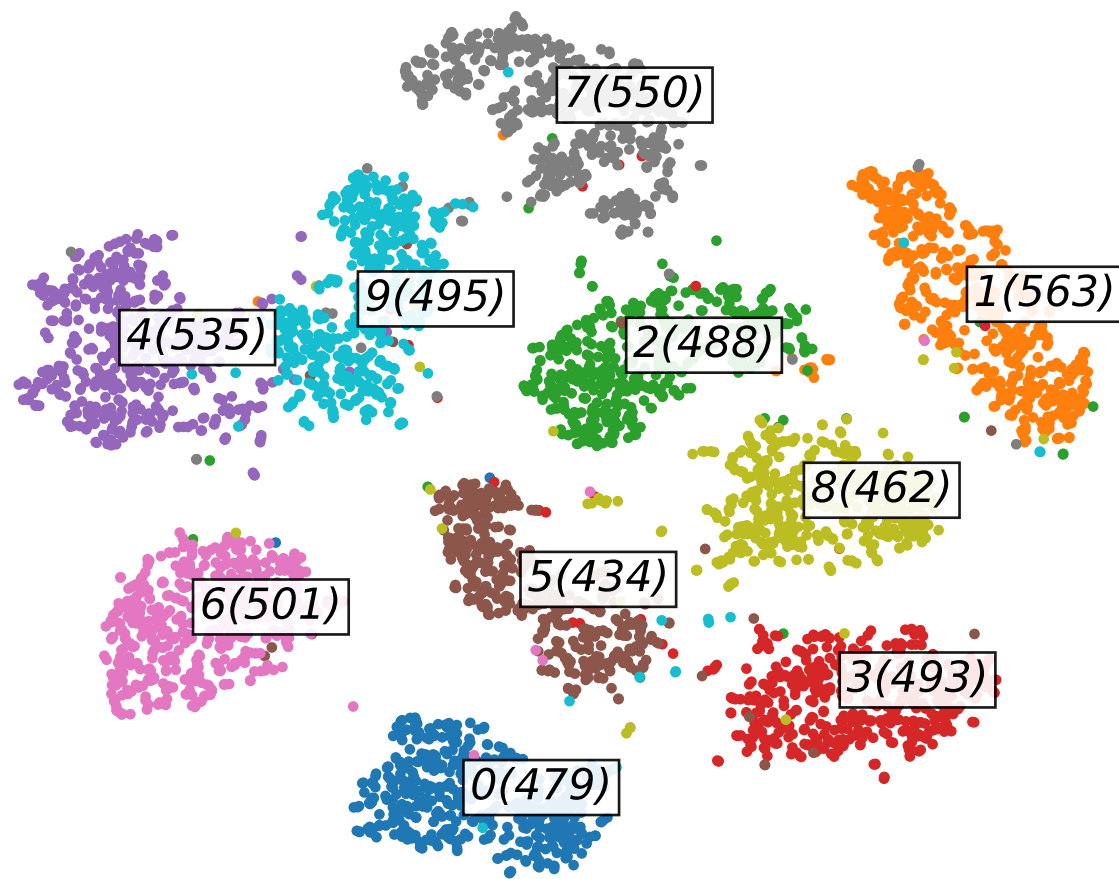

DDPM Epoch 4

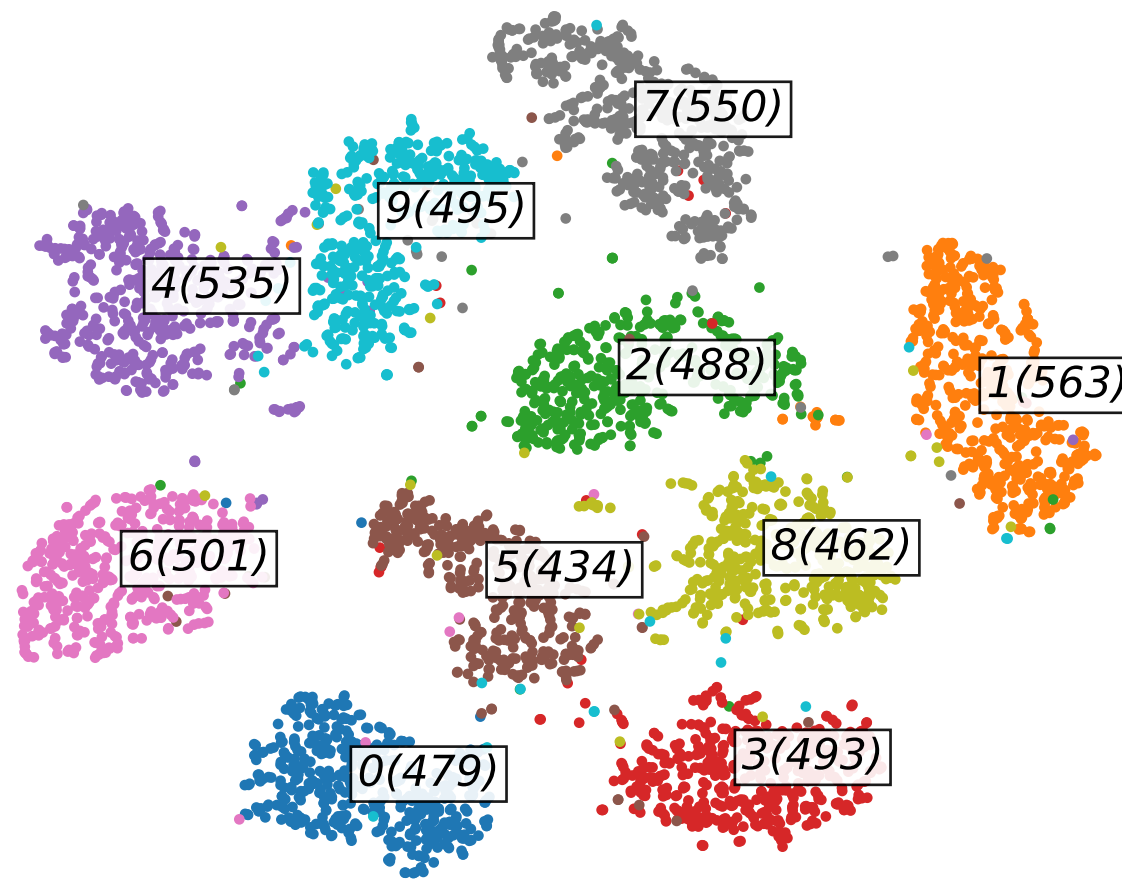

Supplement: supplementary_material [file attachment]

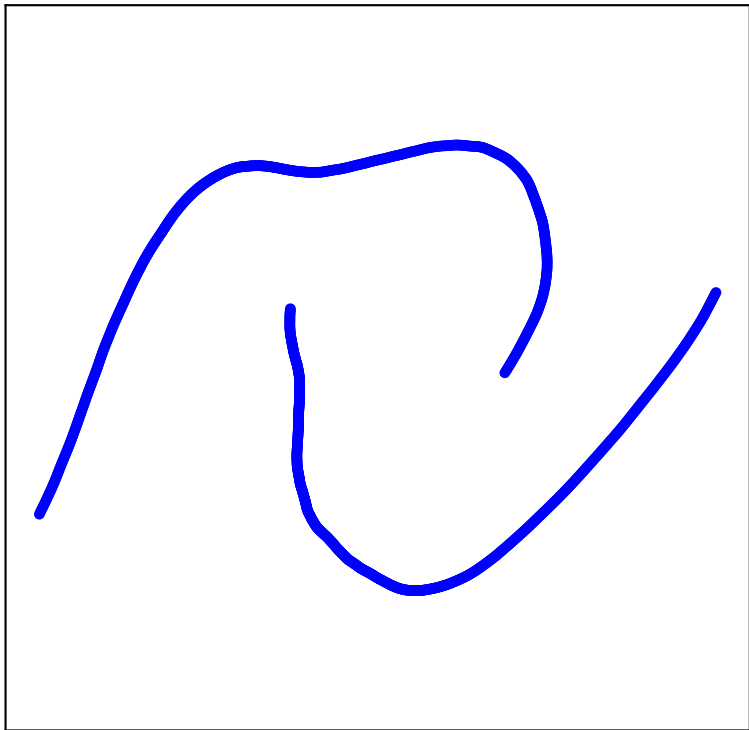

Supplement: supplementary_material [file attachment]

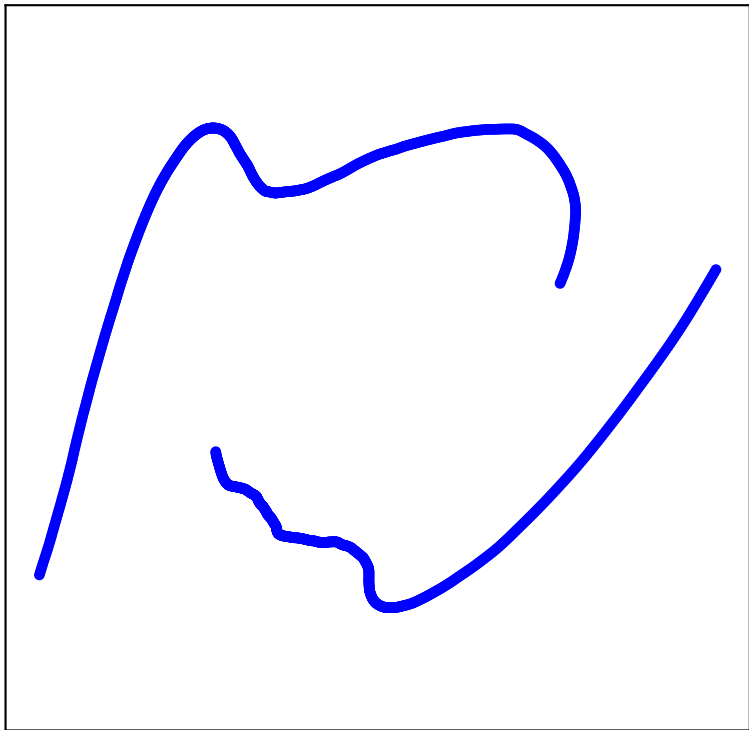

Supplement: supplementary_material [file attachment]

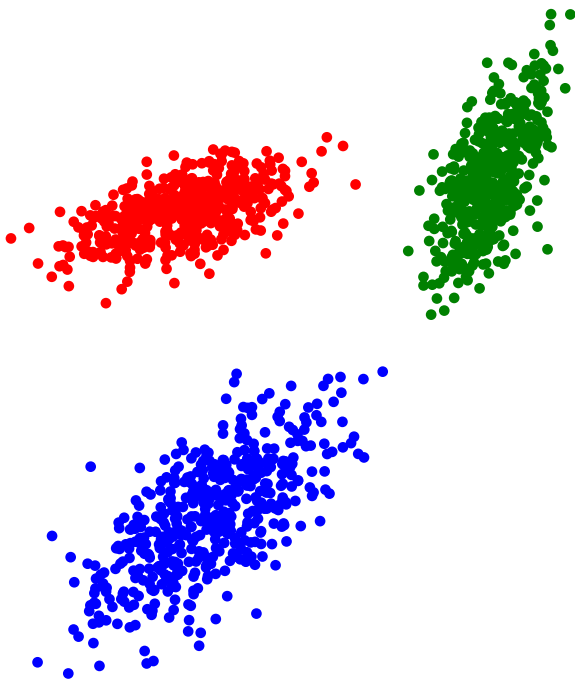

Supplement: supplementary_material [file attachment]

MNIST

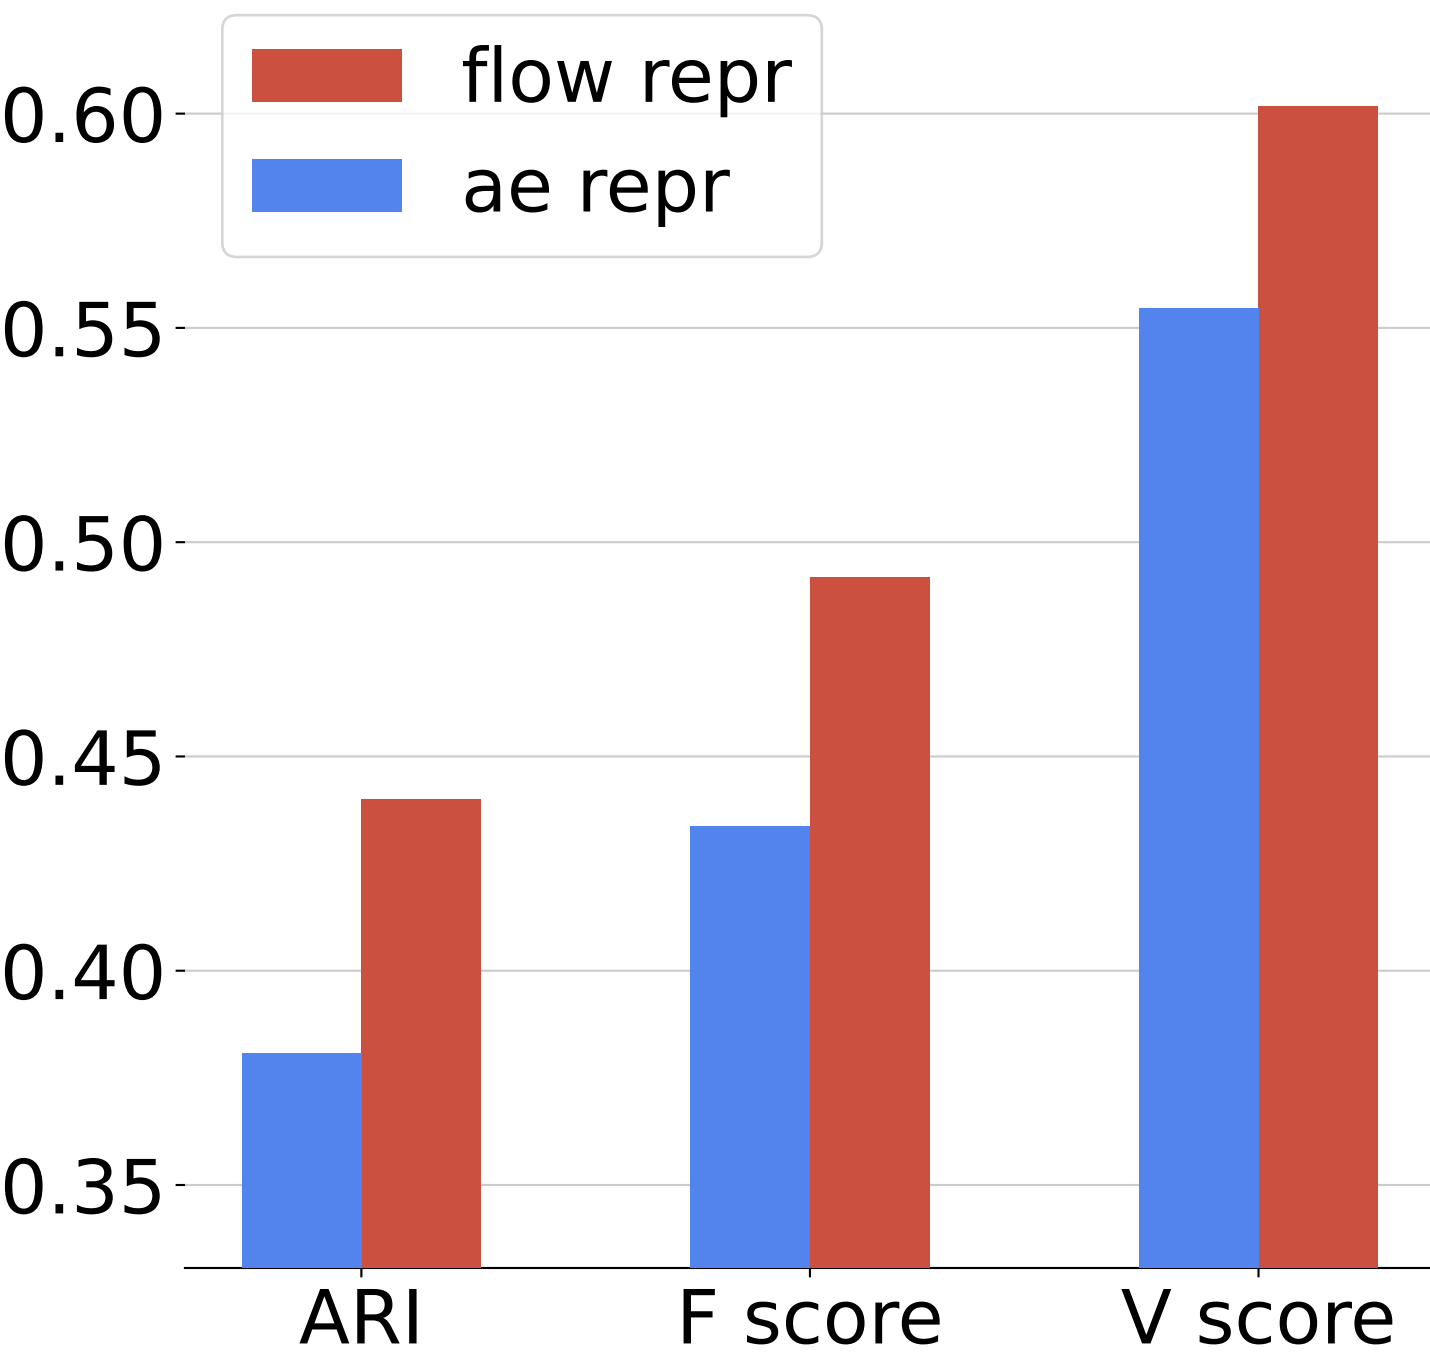

STL-10

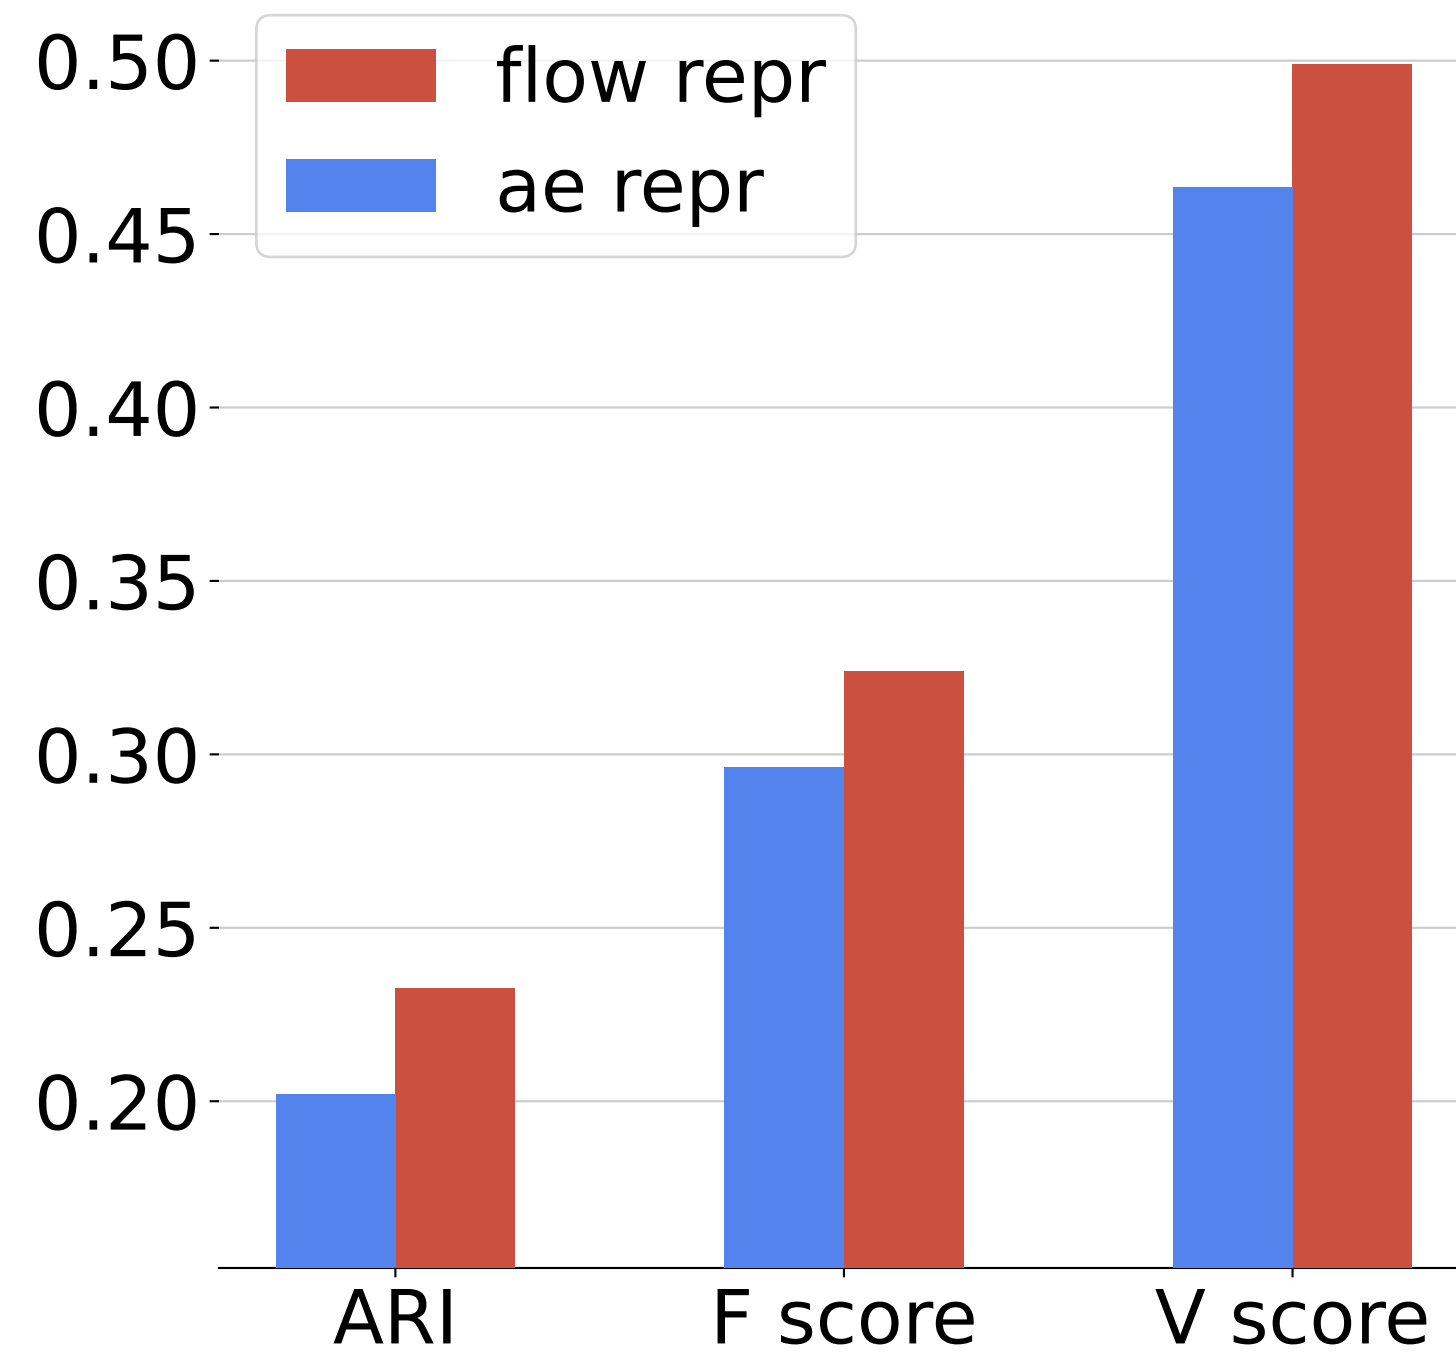

HHAR

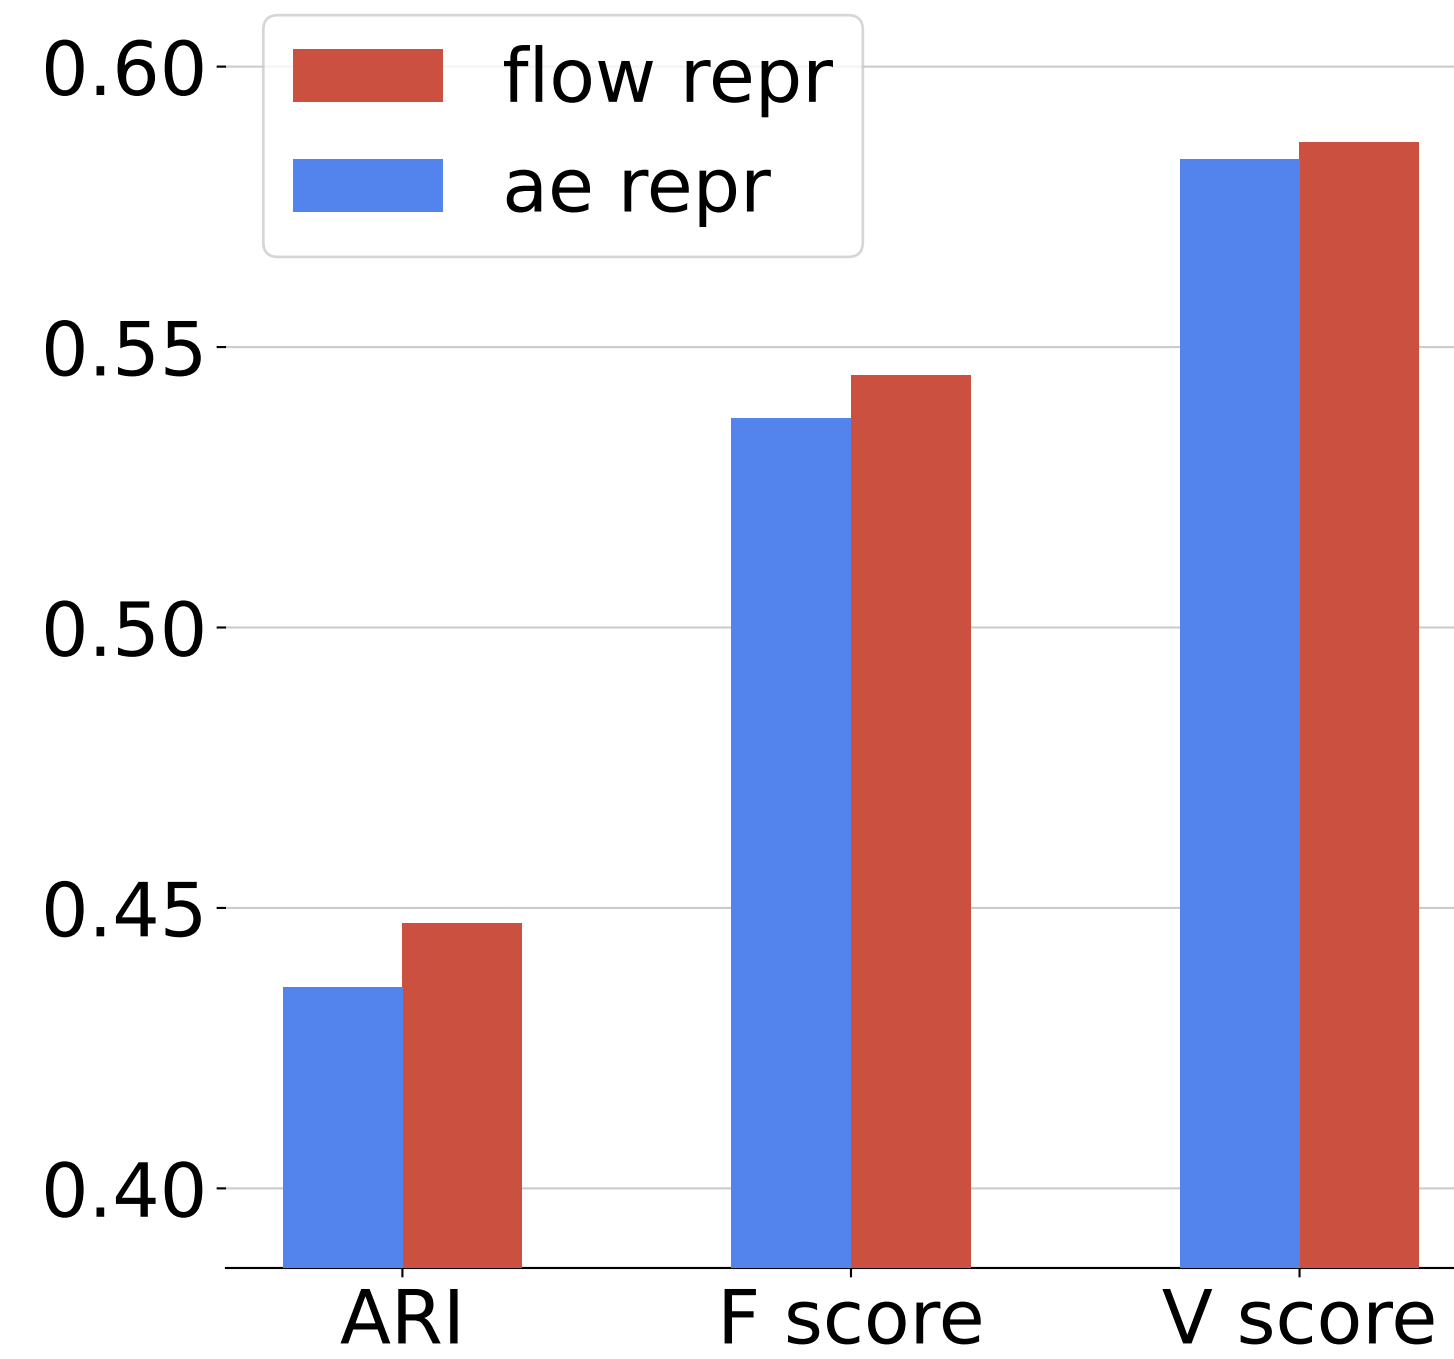

REU-10K

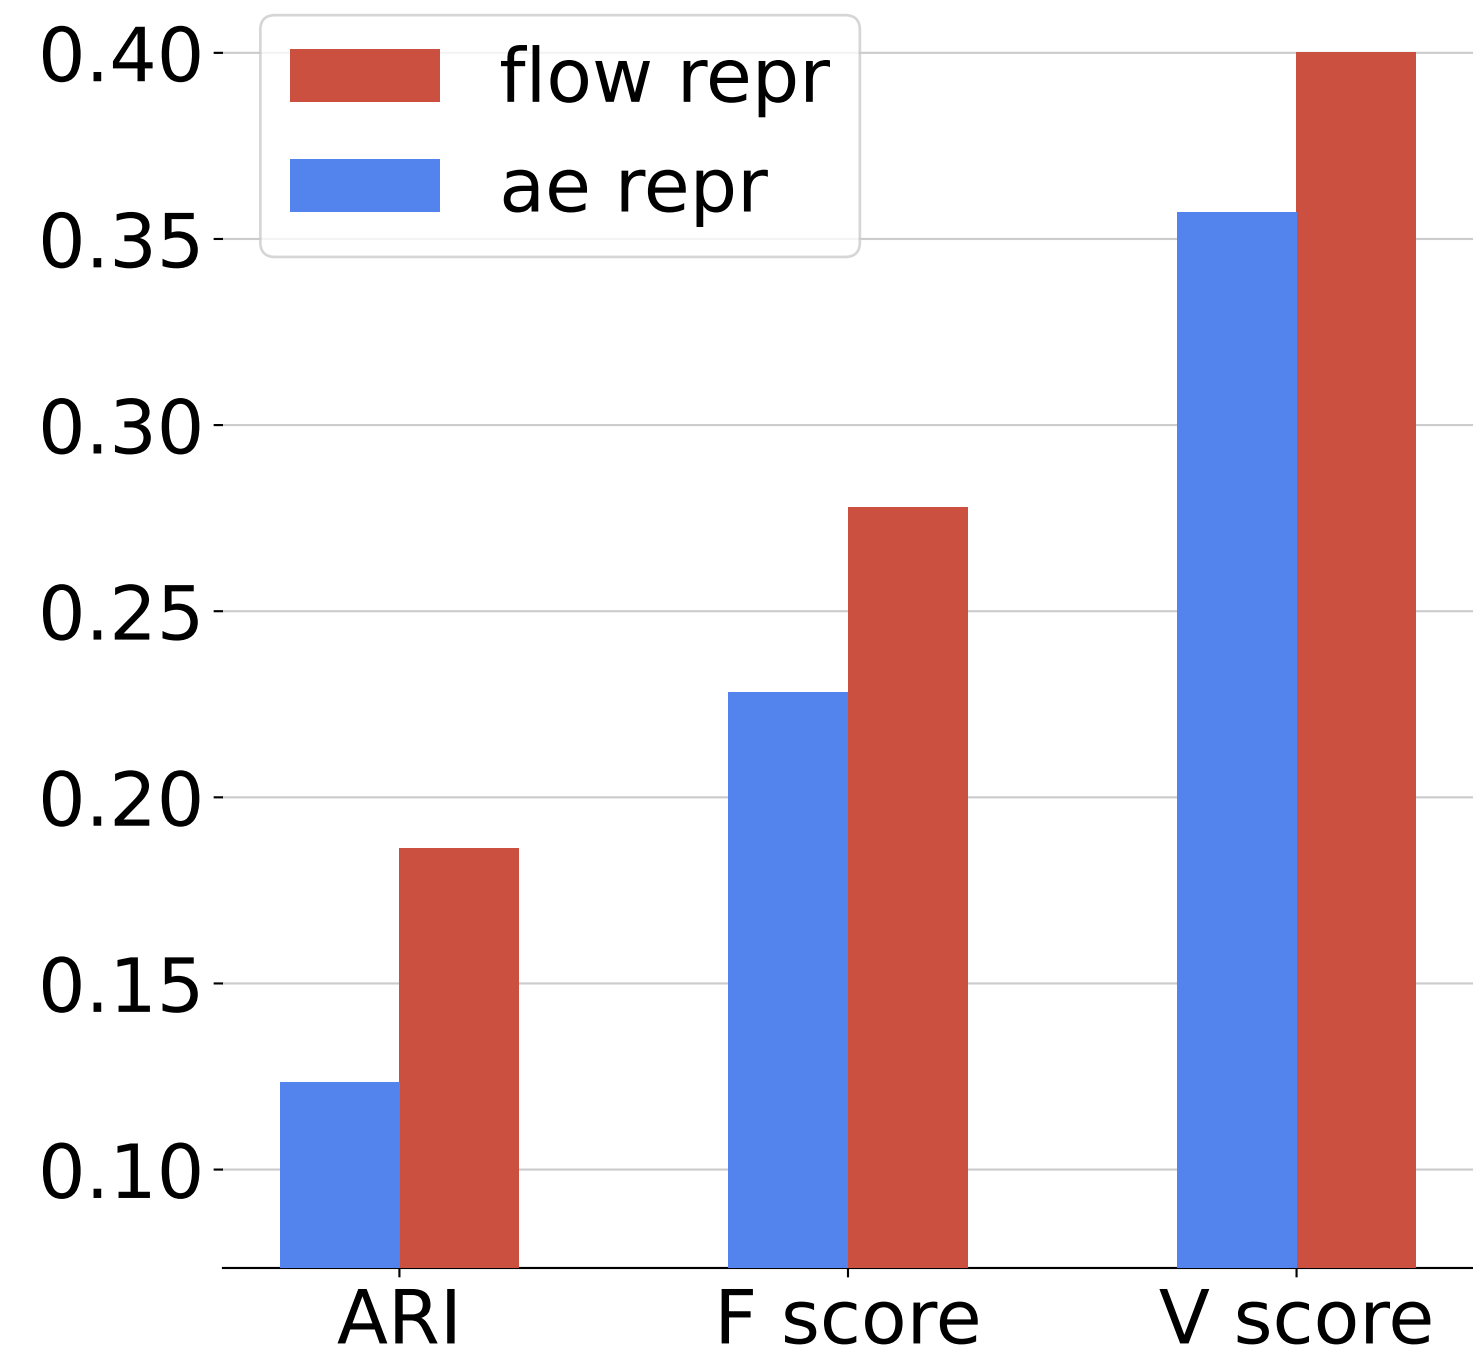

Supplement: supplementary_material [file attachment]

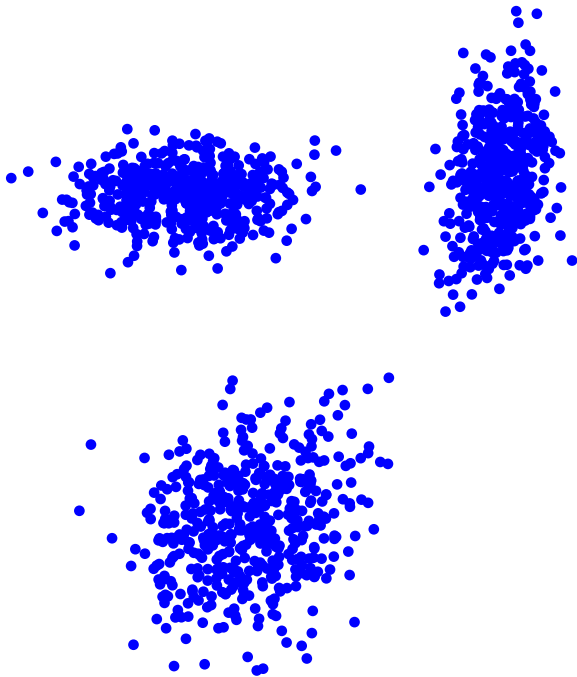

Supplement: supplementary_material [file attachment]

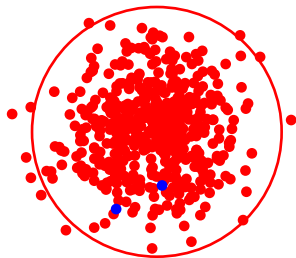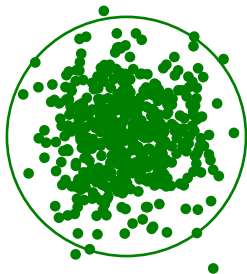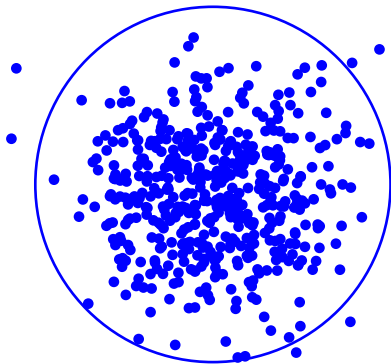

Supplement: supplementary_material [file attachment]

MNIST

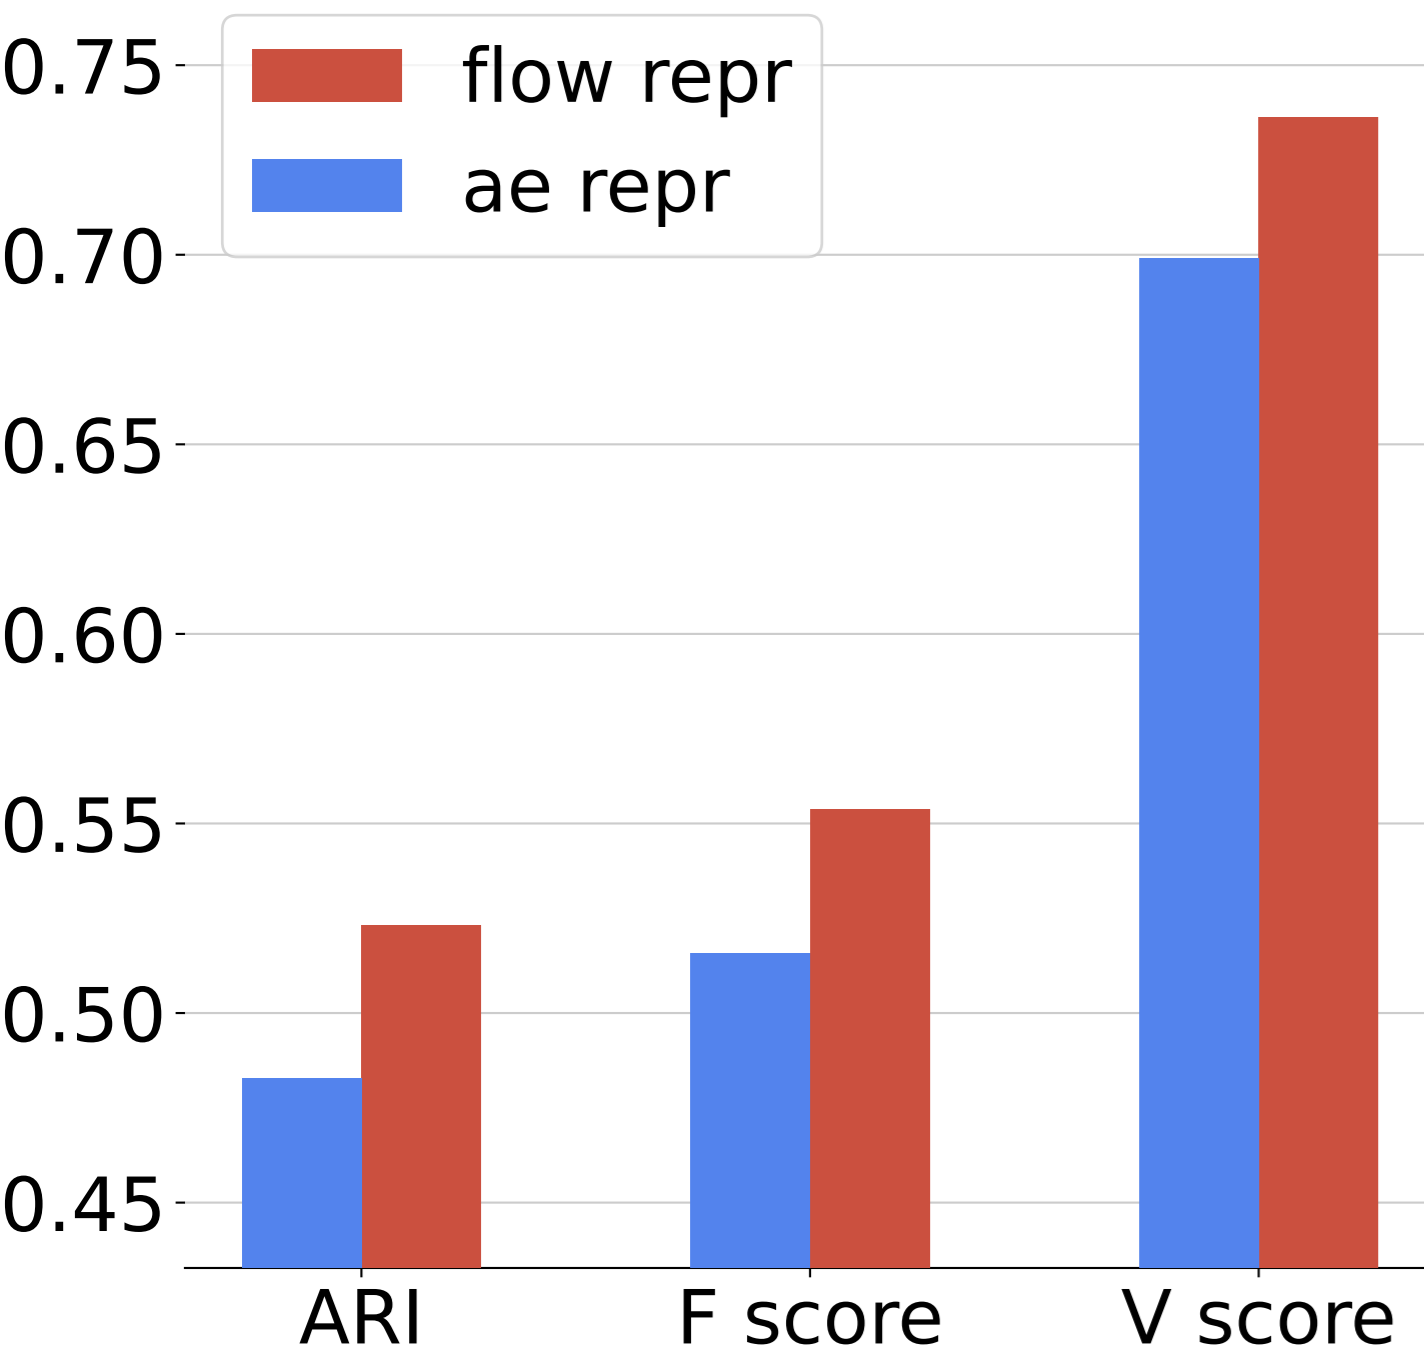

STL-10

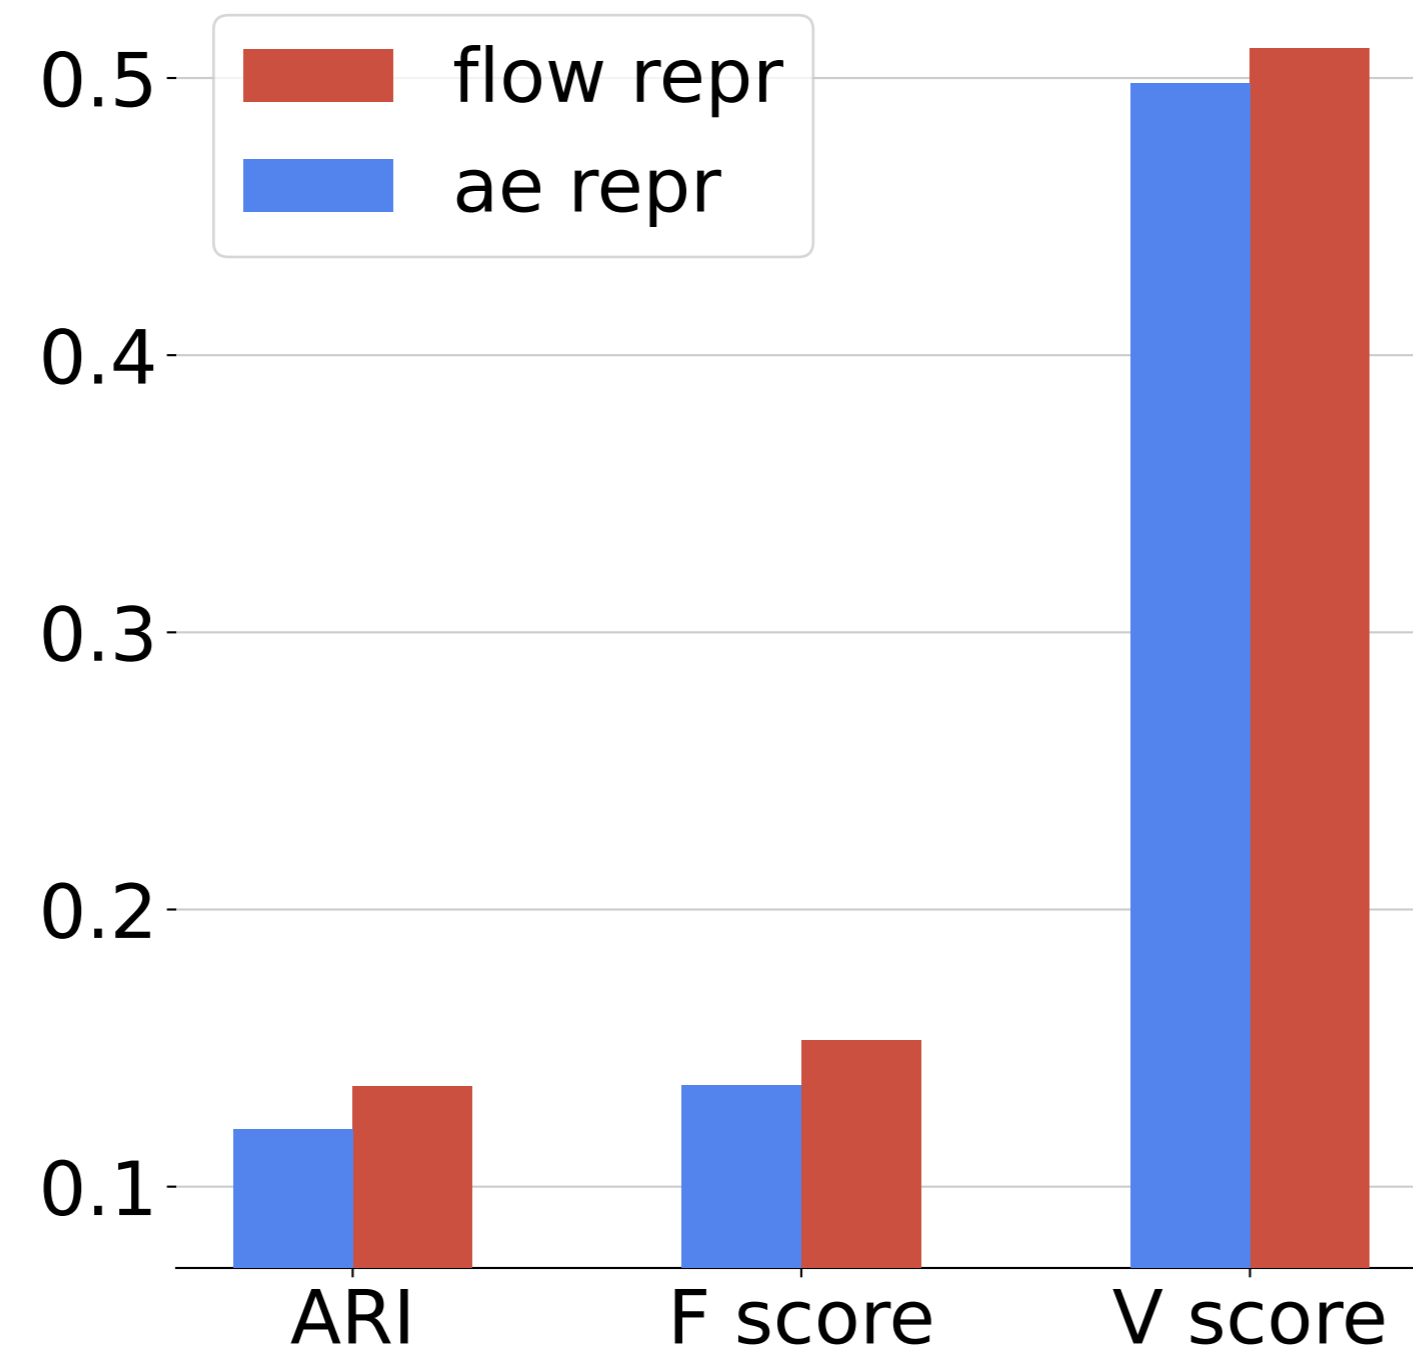

HHAR

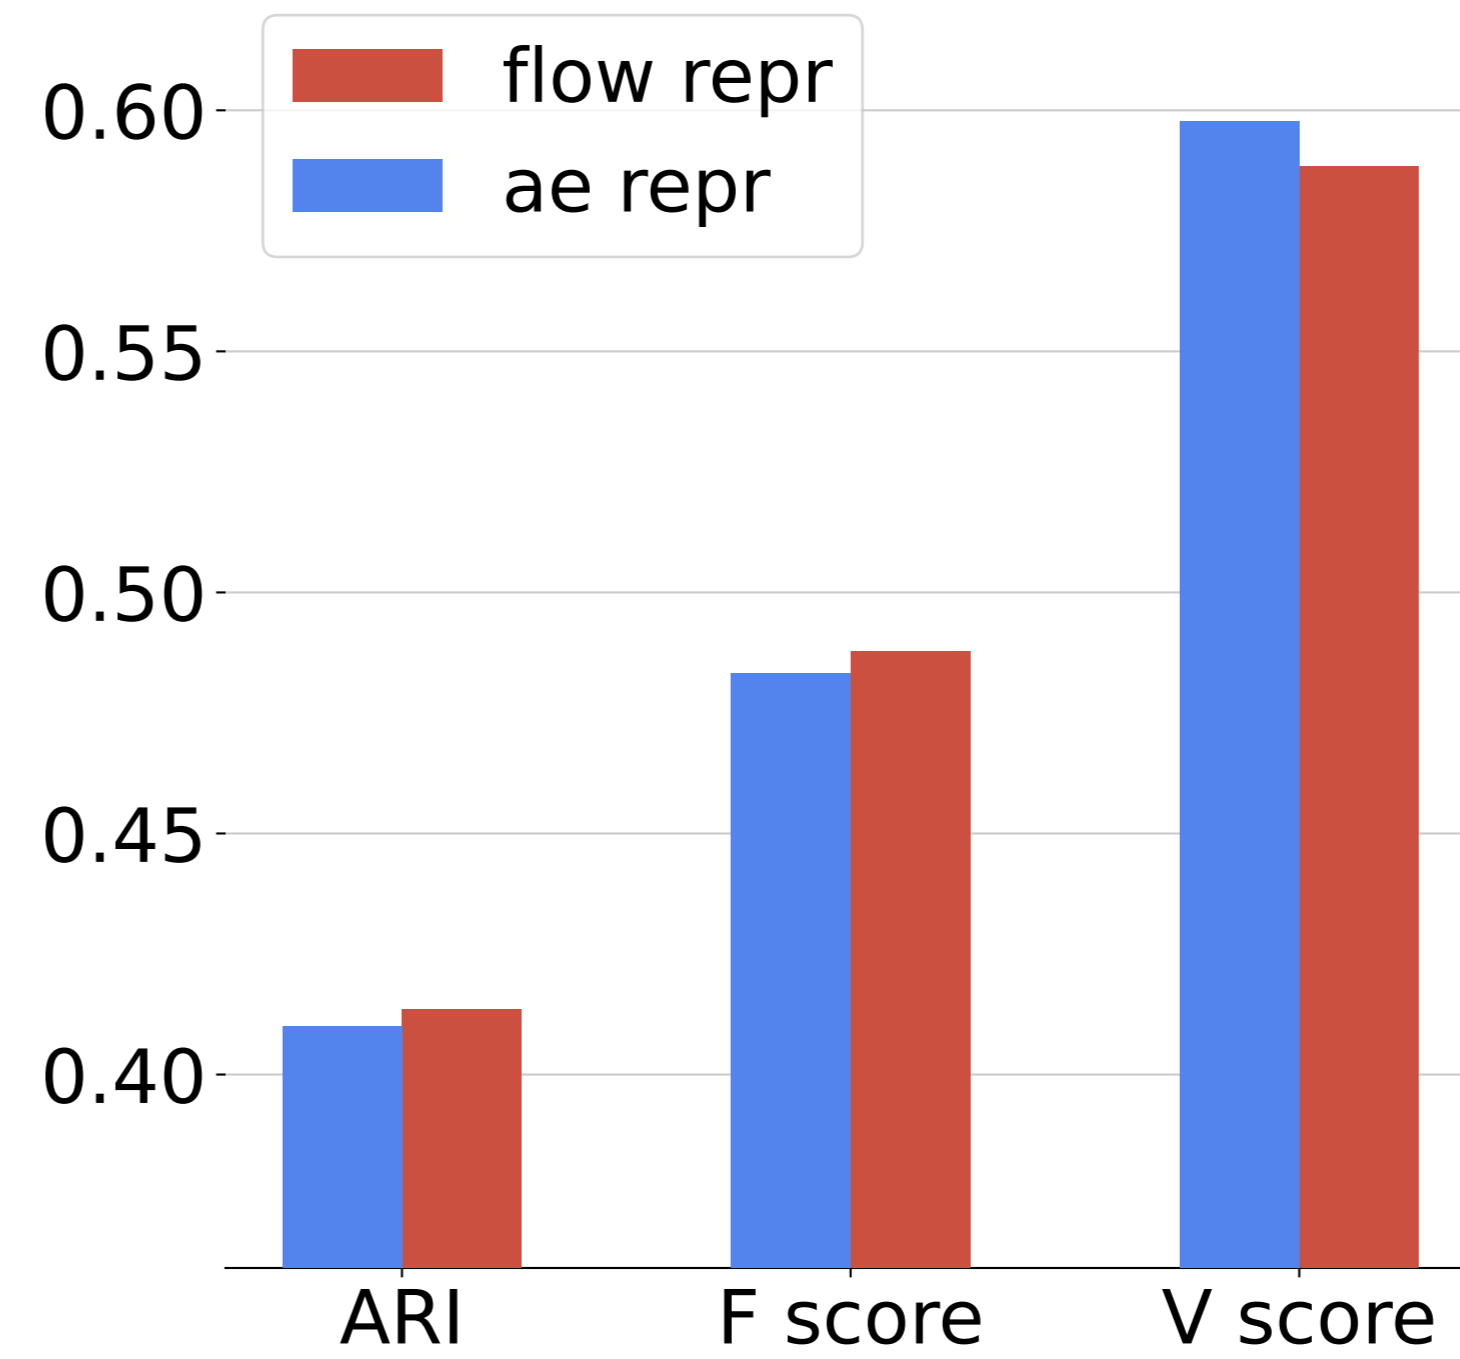

REU-10K

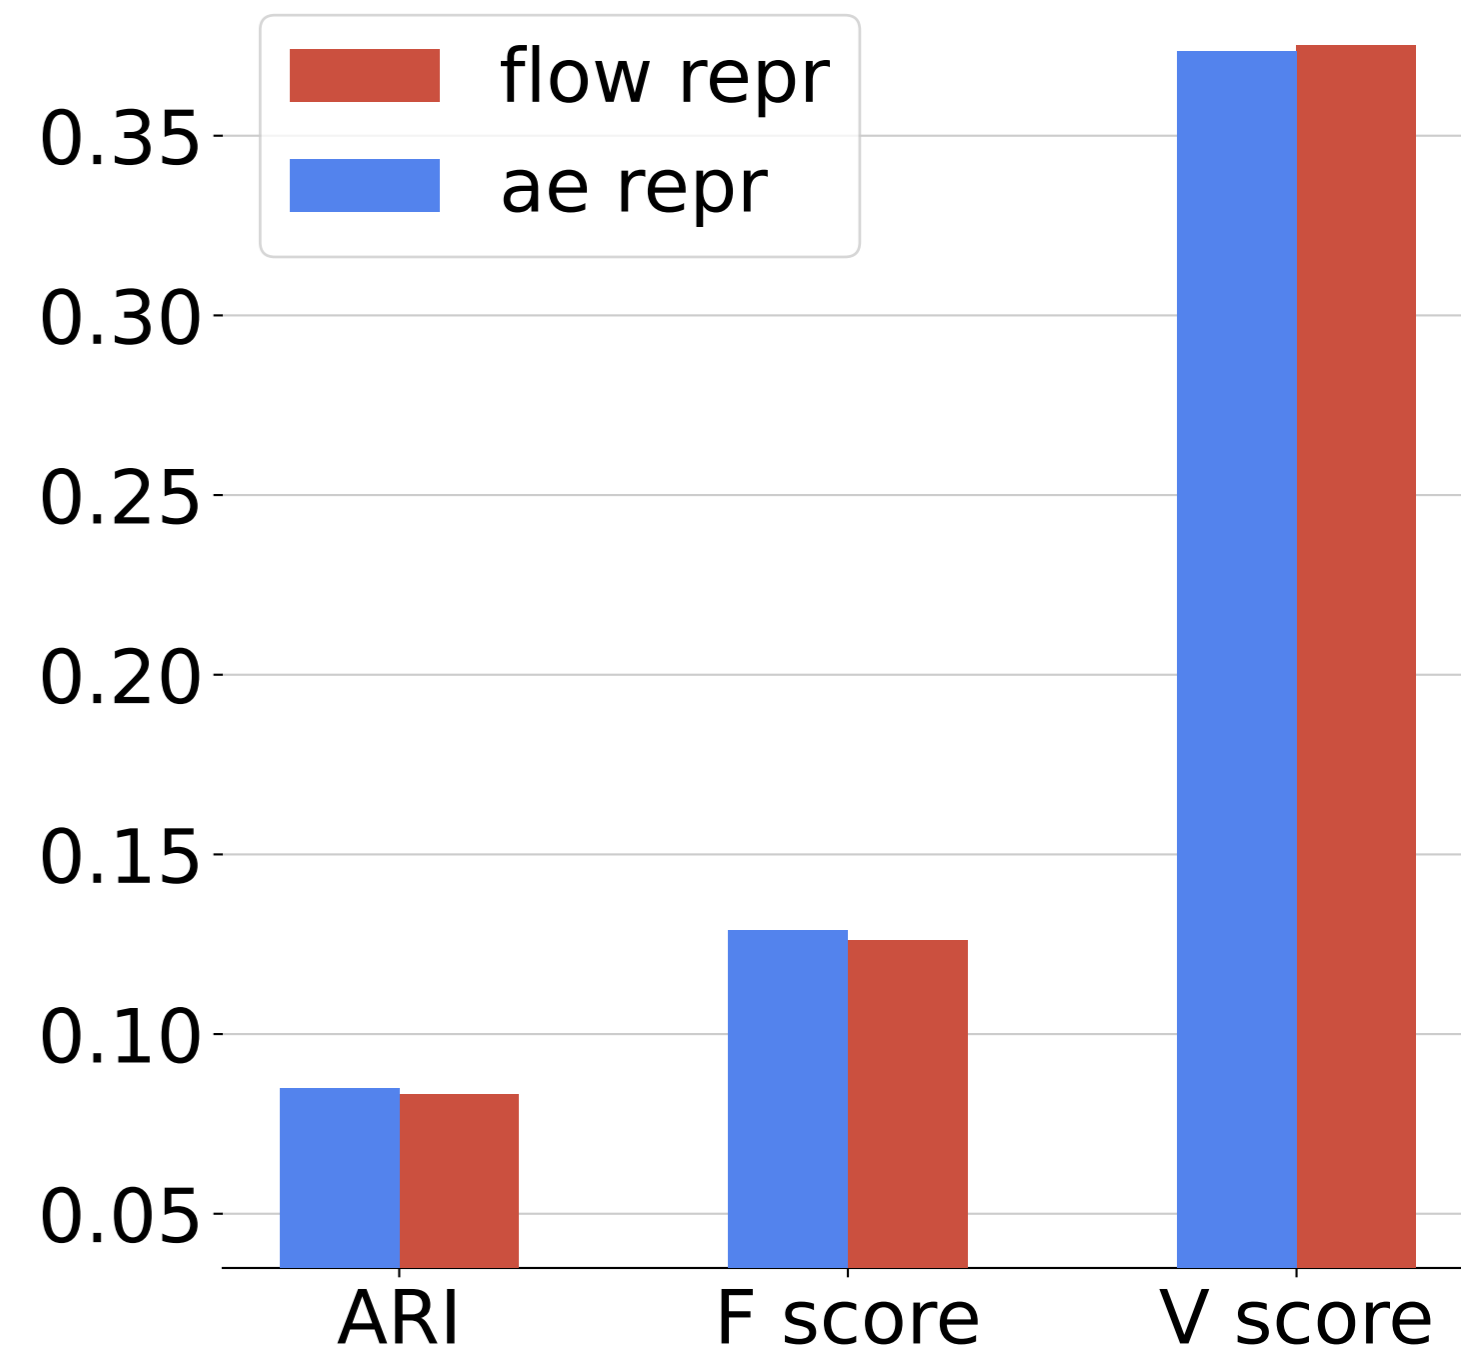

Supplement: supplementary_material [file attachment]

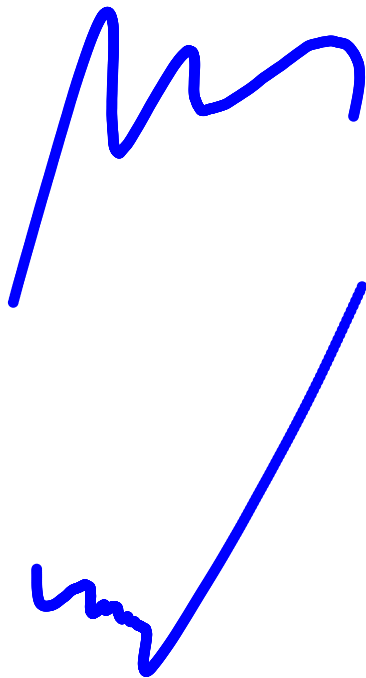

Supplement: supplementary_material [file attachment]

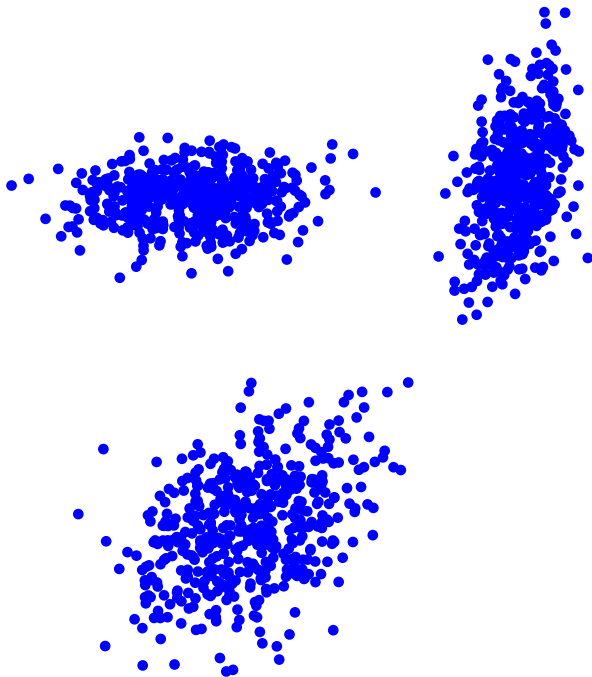

Supplement: supplementary_material [file attachment]

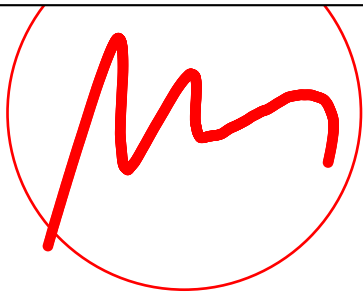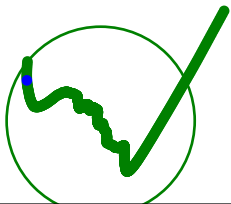

Supplement: supplementary_material [file attachment]
